# Supplementary material
Source: PubMed Central journal article supplement (PMC2995117)
Supplement: supp_btq573_10_09_29_BTerMos_sup.pdf [file supp_btq573_10_09_29_BTerMos_sup.pdf]

## Supplemental Table and Figures

|             | TerMo <sup>1</sup> | Dom <sup>2</sup> | Fam <sup>2</sup> | Super <sup>2</sup> | Fold <sup>2</sup> | Class <sup>2</sup> | PDB <sup>2</sup> |
|-------------|--------------------|------------------|------------------|--------------------|-------------------|--------------------|------------------|
| coil        | -- -- -- C4        | 32229            | 5809             | 4128               | 3122              | 409                | 148              |
|             | -- -- T1 C3        | 72849            | 9341             | 6359               | 4744              | 609                | 214              |
|             | -- E1 -- C3        | 61365            | 8055             | 5372               | 3985              | 542                | 207              |
|             | H1 -- -- C3        | 48912            | 8155             | 5546               | 4209              | 577                | 263              |
| turn        | -- -- T4 --        | 18634            | 4112             | 2944               | 2252              | 296                | 107              |
|             | -- -- T3 C1        | 65781            | 8449             | 5821               | 4345              | 560                | 220              |
|             | -- E1 T3 --        | 25494            | 5194             | 3706               | 2857              | 467                | 201              |
|             | H1 -- T3 --        | 31460            | 6585             | 4631               | 3564              | 570                | 241              |
| extended    | -- E4 -- --        | 541857           | 9877             | 6185               | 4462              | 503                | 214              |
|             | -- E3 -- C1        | 243119           | 11157            | 7261               | 5292              | 687                | 272              |
|             | -- E3 T1 --        | 116240           | 9625             | 6403               | 4753              | 677                | 259              |
|             | H1 E3 -- --        | 160050           | 8535             | 5702               | 4409              | 679                | 278              |
| helix       | H4 -- -- --        | 481119           | 12974            | 8618               | 6547              | 884                | 387              |
|             | H3 -- -- C1        | 200444           | 12341            | 8515               | 6552              | 1052               | 441              |
|             | H3 -- T1 --        | 216333           | 12710            | 8731               | 6696              | 1102               | 433              |
|             | H3 E1 -- --        | 142722           | 6803             | 4676               | 3754              | 599                | 268              |
| mixed       | -- -- T2 C2        | 95261            | 10412            | 6702               | 4965              | 591                | 244              |
|             | -- E2 -- C2        | 128678           | 10411            | 6895               | 5066              | 682                | 260              |
|             | H2 -- -- C2        | 94130            | 11024            | 7598               | 5796              | 960                | 376              |
|             | -- E2 T2 --        | 50346            | 7692             | 4987               | 3793              | 540                | 244              |
|             | H2 -- T2 --        | 80826            | 10406            | 7090               | 5489              | 897                | 370              |
|             | H2 E2 -- --        | 120143           | 7733             | 5257               | 4140              | 652                | 293              |
|             | -- E1 T1 C2        | 96856            | 10822            | 7120               | 5200              | 642                | 273              |
|             | H1 -- T1 C2        | 87672            | 11783            | 7935               | 5972              | 946                | 359              |
|             | H1 E1 -- C2        | 58232            | 8105             | 5452               | 4149              | 646                | 261              |
|             | -- E1 T2 C1        | 76329            | 9668             | 6542               | 4885              | 713                | 282              |
|             | H1 -- T2 C1        | 79652            | 11497            | 7799               | 5891              | 913                | 346              |
|             | H1 E1 T2 --        | 28795            | 6171             | 4310               | 3444              | 627                | 259              |
|             | -- E2 T1 C1        | 125608           | 11717            | 7781               | 5772              | 865                | 353              |
|             | H1 E2 -- C1        | 102568           | 9446             | 6418               | 4996              | 816                | 330              |
|             | H1 E2 T1 --        | 57732            | 8033             | 5519               | 4355              | 779                | 363              |
|             | H2 -- T1 C1        | 146711           | 13827            | 9426               | 7170              | 1124               | 453              |
|             | H2 E1 -- C1        | 93745            | 8612             | 5963               | 4646              | 918                | 379              |
|             | H2 E1 T1 --        | 62116            | 7665             | 5004               | 3994              | 698                | 320              |
| H1 E1 T1 C1 | 69183              | 9490             | 6471             | 5000               | 936               | 371                |                  |

**Supplemental Table S1.** Results of clustering cliques: Number of clusters. <sup>1</sup>For TerMo definitions of secondary structure H: # of residues in helix, E: # of residues in extended sheet, T: # of residues in turn, C: # of residues in coil. <sup>2</sup>In SCOP, there are 15,273 total domains (Dom); 3,463 families (Fam); 1,776 superfamilies (Super); 1,086 folds (Fold); and 7 classes (Class).

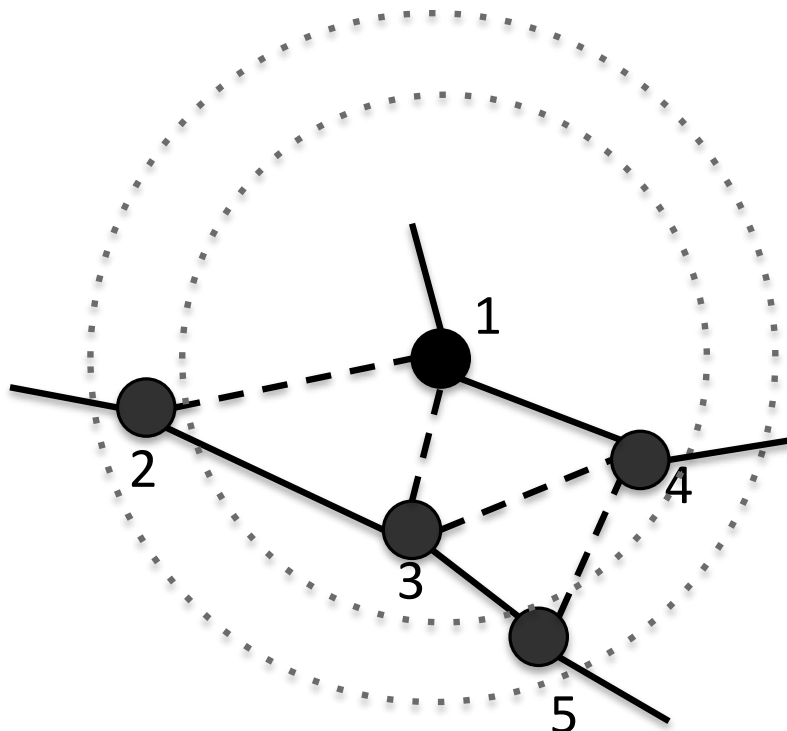

**Supplemental Figure S1.** Differences between the Delaunay tessellation and a radial distance cutoff. The numbered dark balls represent residues. Solid black lines represent the backbone connections between the residues. Black dashed lines are the contacts defined by the Delaunay tessellation. The grey dotted lines represent two radial distance cutoffs from atom 1. The short cutoff misses the contact with atom 2. A longer contact introduces a spurious contact with atom 5. The sets of atoms 1-2-3, 1-3-4, and 3-4-5 represent three atom RPGs, respectively.

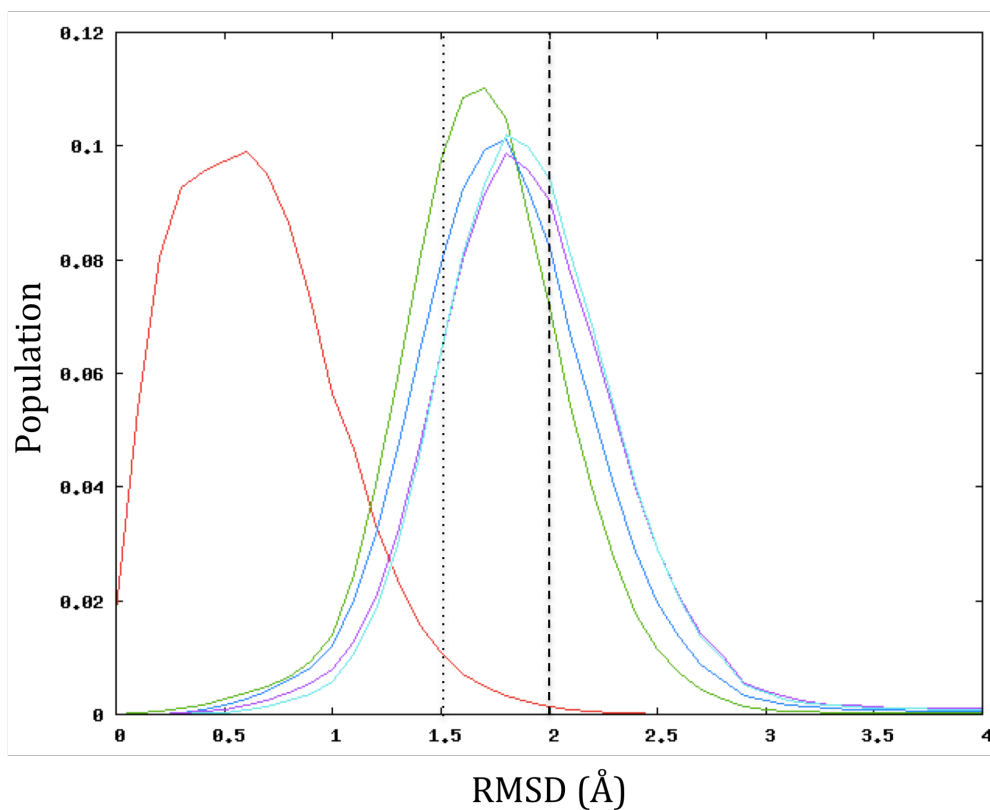

**Supplemental Figure S2.**  $C\alpha$ -centroid RMSD distributions for Family clique pairs with differing amounts of sequence alignment. Red: all four residues aligned. Green: three residues aligned. Blue: two residues aligned. Magenta: one residue aligned. Cyan: no residues aligned. The dotted and dashed lines show the short (1.5 Å) and long (2.0 Å) cutoffs used. 97.9% of completely aligned cliques have an RMSD < 1.5 Å and 99.8% have an RMSD < 2.0 Å. 18.9% of partially or completely unaligned cliques have an RMSD < 1.5 Å and 65.8% have an RMSD < 2.0 Å.

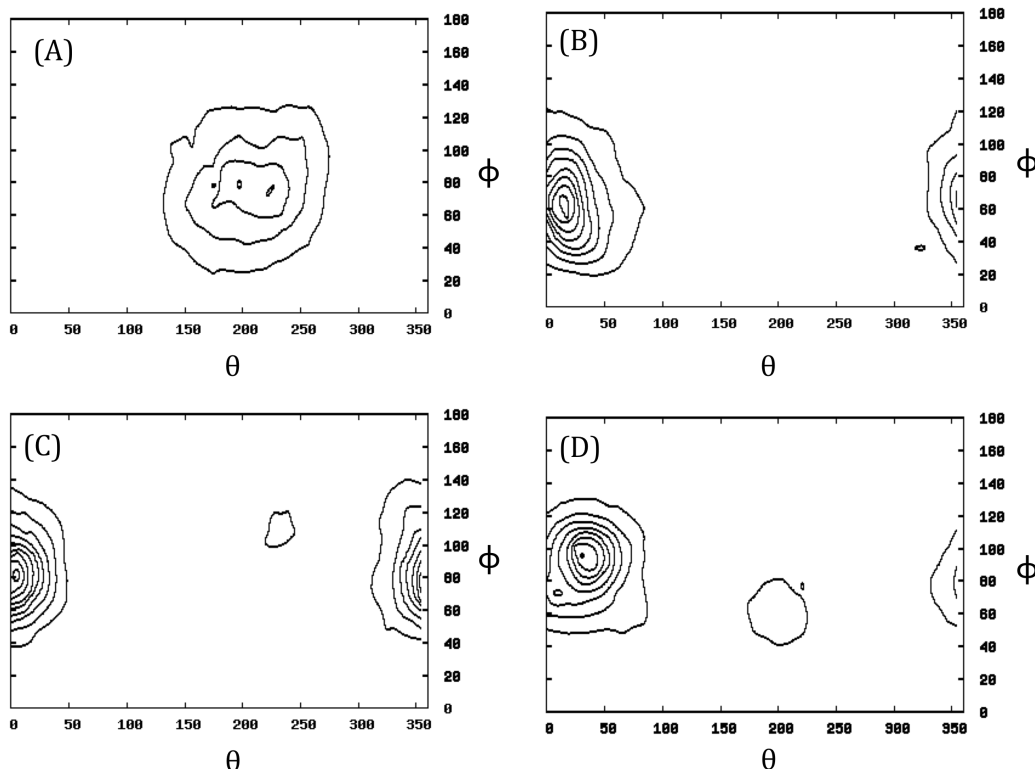

**Supplemental Figure S3.** Side-chain orientations, expressed as the angular coordinates ( $\theta, \phi$ ) of the  $C\alpha$ -centroid vector, for each position in the mixed helix-sheet TerMo [H1 E3 - -] shown in Figure 2A of the main text. (A) Position 1, the helical residue. (B) Position 2, the first sheet residue. (C) Position 3, the second sheet residue. (D) Position 4, the third sheet residue.

While a 2.0 Å RMSD cutoff allows a comparison the entire PDB, the resulting clusters do not always preserve side-chain orientations. For example, the RPGs in the helix-sheet TerMo [H1 E3 - -] were aligned to their representative structure and the orientations of their  $C\alpha$ -centroid vectors were calculated in polar coordinates ( $\theta, \phi$ ). The dominant orientations of the sheet positions are parallel to one another but antiparallel to the helix position: essentially a helical residue pointing into three sheet residues. Small but significant orientation subpopulations are seen at positions 3 and/or 4, 2% for both positions, 10% at only 3, and 15% at only 4.

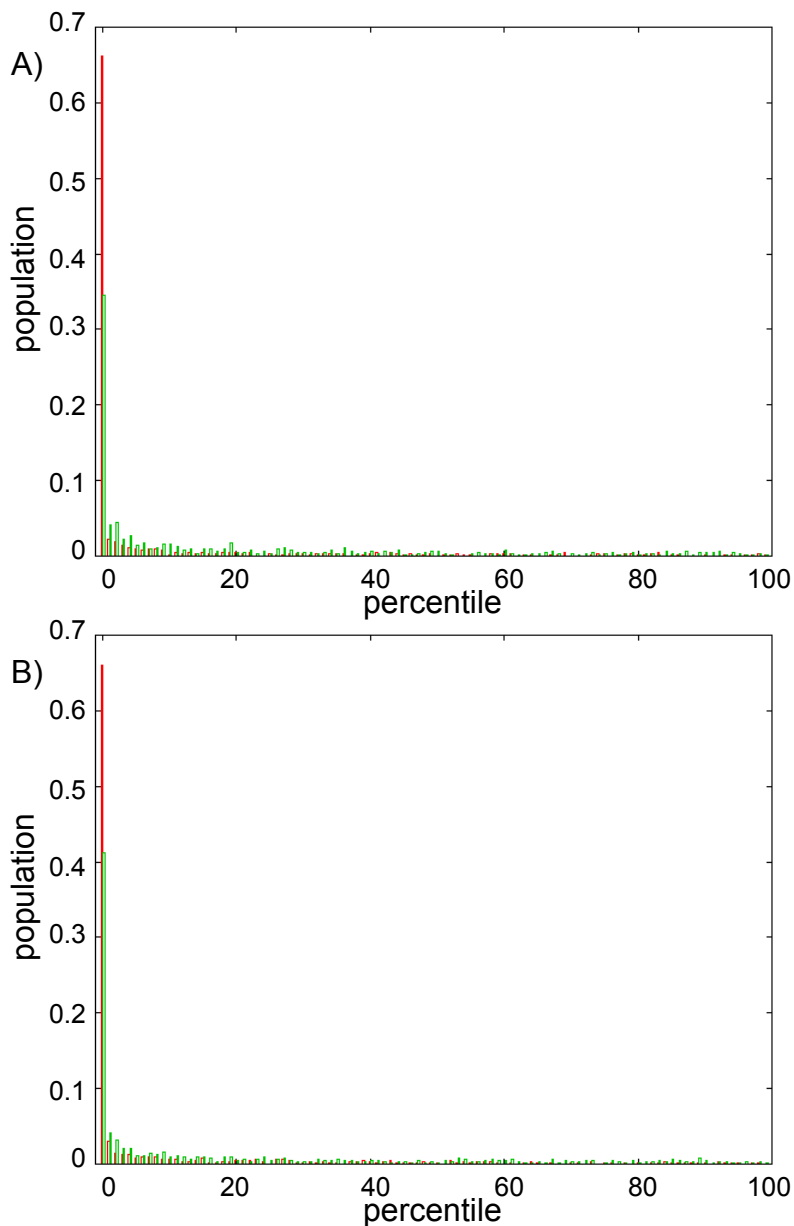

**Supplemental Figure S4:** TerMo properties as percentiles of random clusters. The (A) radius of gyration (Rg) and (B) solvent accessible surface area (SASA) were calculated for all RPGs in all TerMos with at least 100 members. We then calculated the average and sample standard deviation of Rg and SASA for each TerMo and 1000 random clusters of the same size as each TerMo. We then determined the percentile of the distribution defined by our random clusters occupied by the true TerMo mean (red) and standard deviation (green). These percentiles are collected for all TerMos and shown in the histograms above. If the clustering were random, we would expect the above distributions to be uniform. As the distributions are strongly biased toward low percentiles (i.e. low probabilities of the real values being seen in random clusters), we conclude that our clustering is not random. The ensemble mean and standard deviation of Rg are 4.0 Å and 0.5 Å and those of SASA are 11000 Å<sup>2</sup> and 9400 Å<sup>2</sup> (see supplemental figure S5).

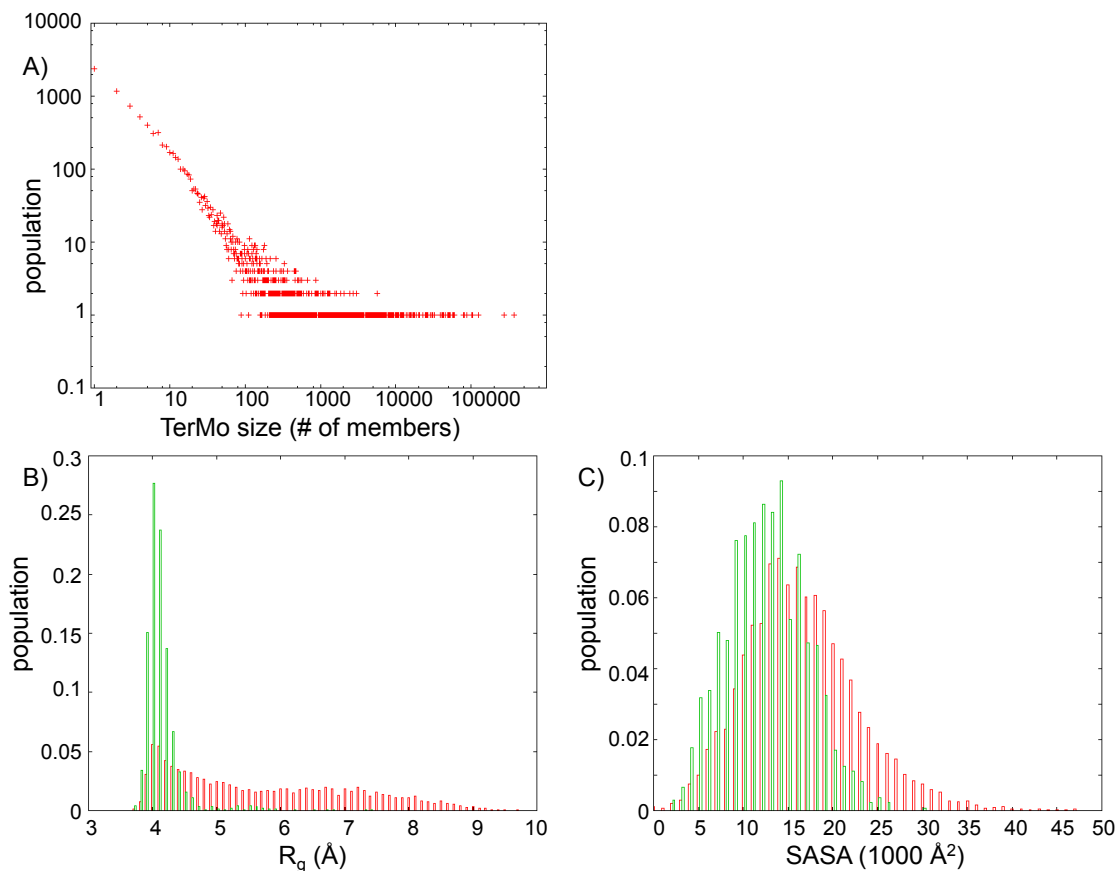

**Supplemental Figure S5:** TerMo properties. A complete listing of all TerMos, their populations, radii of gyration, and solvent accessible surface areas are available from the authors. A) Histogram of TerMo populations. Note that both axes are logarithmic. The average size of a TerMo cluster is 405 members and 98% of the RPG cliques are in TerMos of at least 100 or larger. B) Histogram of average TerMo radius of gyration ( $R_g$ ). Red: all TerMos with a mean of  $5.73 \text{ \AA}$  and deviation of  $1.42 \text{ \AA}$ . Green: Termsos with at least 100 members with a mean of  $4.18 \text{ \AA}$  and deviation of  $0.32 \text{ \AA}$ . Large  $R_g$  TerMos do not cluster well, so end up in low population TerMos. C) Histogram of average TerMo solvent accessible surface areas (SASA). Red: all TerMos with a mean of  $16,928 \text{ \AA}^2$  and a deviation of  $6,338 \text{ \AA}^2$ . Green: Termsos with at least 100 members with a mean of  $12,975 \text{ \AA}^2$  and a deviation of  $4,471 \text{ \AA}^2$ . TerMos with high average SASA are more likely to be found on the surface of the protein.

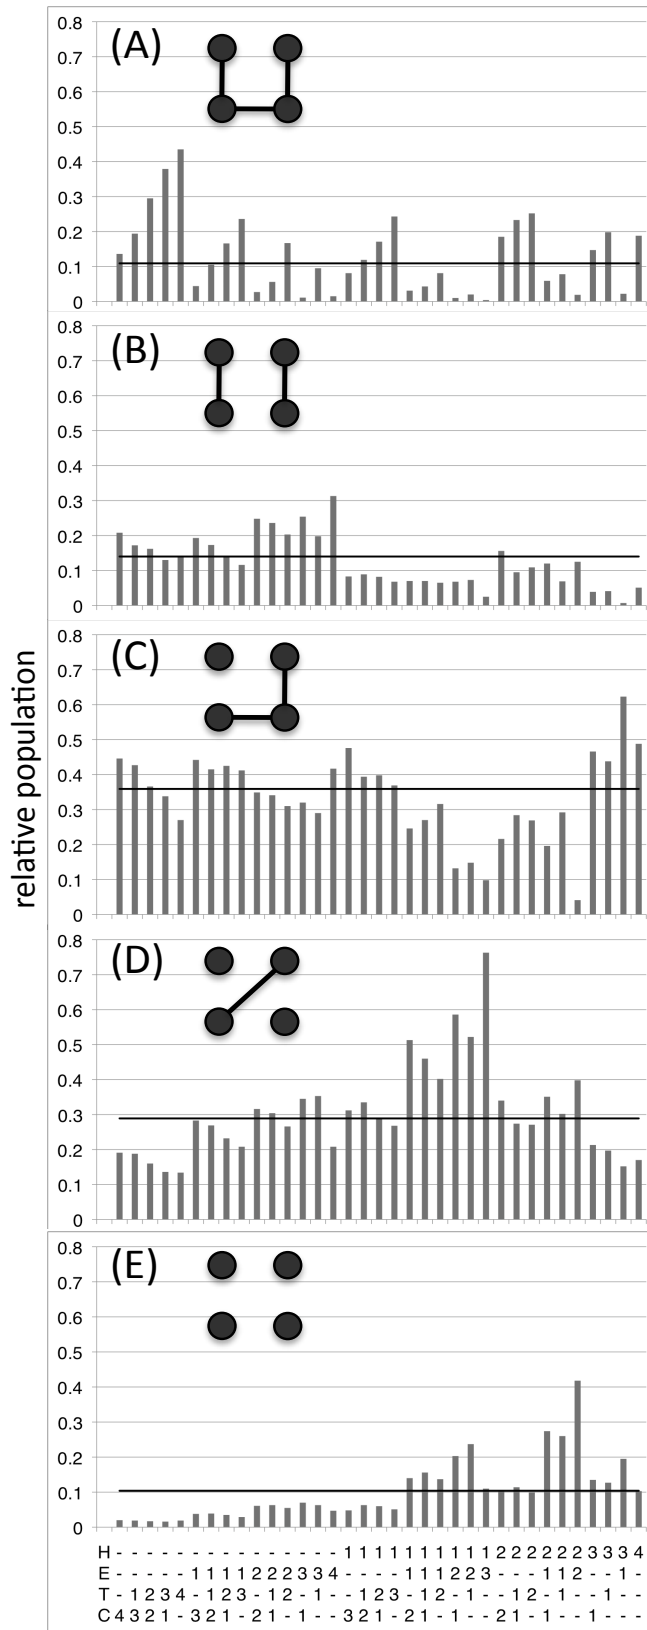

**Supplemental Figure S6.** The distribution of cliques with different amounts of sequence locality as a function of secondary structural class. The secondary structural classes are labeled with four numbers representing the number of residues in helix (H), sheet (E), turn (T), and coil (C). For clarity, a “-” indicates that there are no residues in that secondary structure. If consecutive residues in a clique are separated by fewer than four sequence positions, those residues are considered local. The horizontal line is the fraction of all cliques with a given sequence locality. In the inset diagrams, the circles represent the residues in a clique. Circles connected by a line are local in sequence. (A) all local (4) cliques. (B) mixed local and non-local (2+2) cliques. (C) mixed (3+1) cliques. (D) mixed (1+2+1) cliques. (E) all non-local (1+1+1+1) cliques.
